# Supplementary material for: Granulocyte-Derived Extracellular Vesicles Activate Monocytes and Are Associated With Mortality in Intensive Care Unit Patients
Source: PubMed Central journal article supplement (PMC5951932; doi:10.3389/fimmu.2018.00956), 2018-05-08
Supplement: Image_1.pdf [file Image_1.pdf]

Supplementary Figure 1

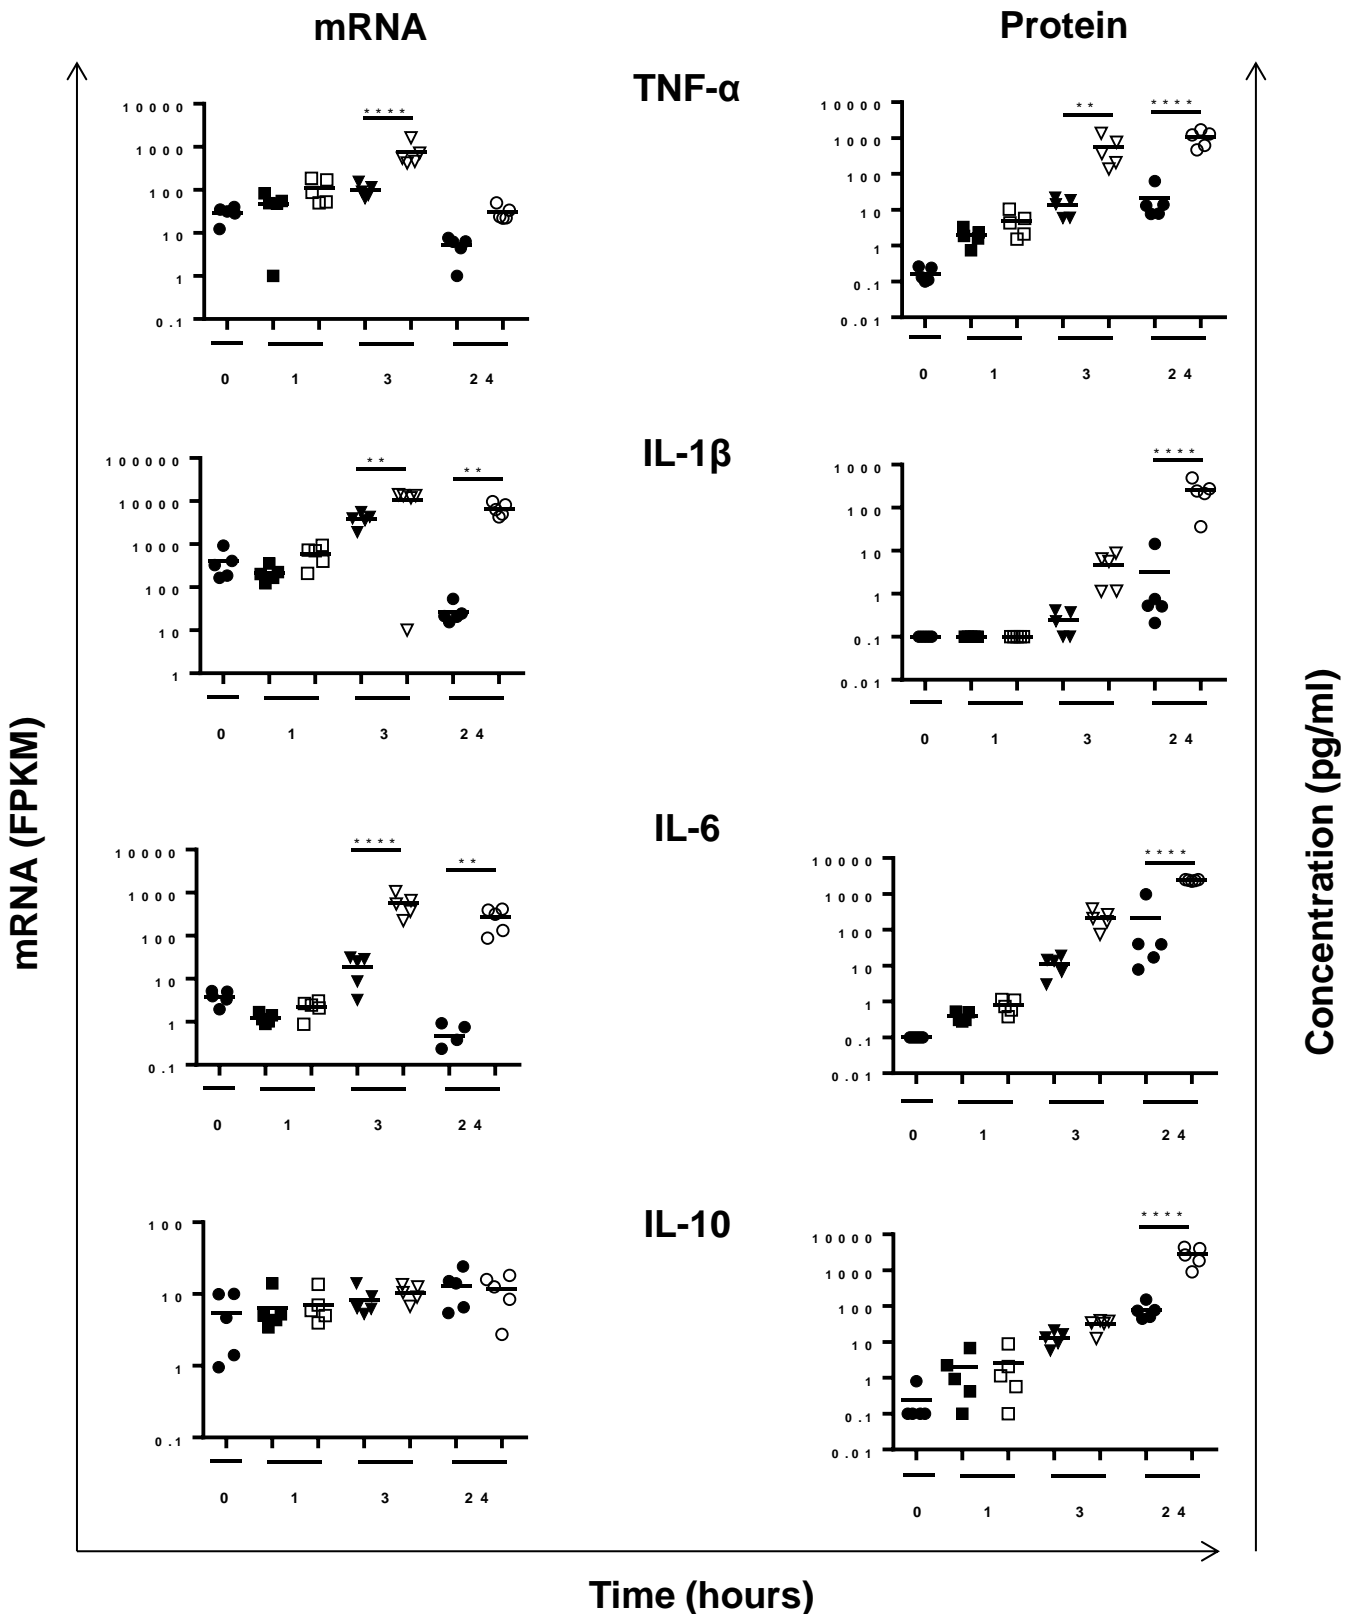

**Supplementary Figure 1: mRNA and protein levels of cytokines induced in monocytes incubated with EVs.** A) Gene expression detected by RNA-Seq and protein expression detected by multiplex assay were compared for 4 representative cytokines after EV-monocyte incubation. Filled symbols represent monocytes ( $10^6$ ) cultured alone and empty symbols represent paired samples incubated with EVs ( $10^6$ ). \*\*p<0.01, \*\*\*\*p<0.0001

# Supplementary Figure 2

**A**

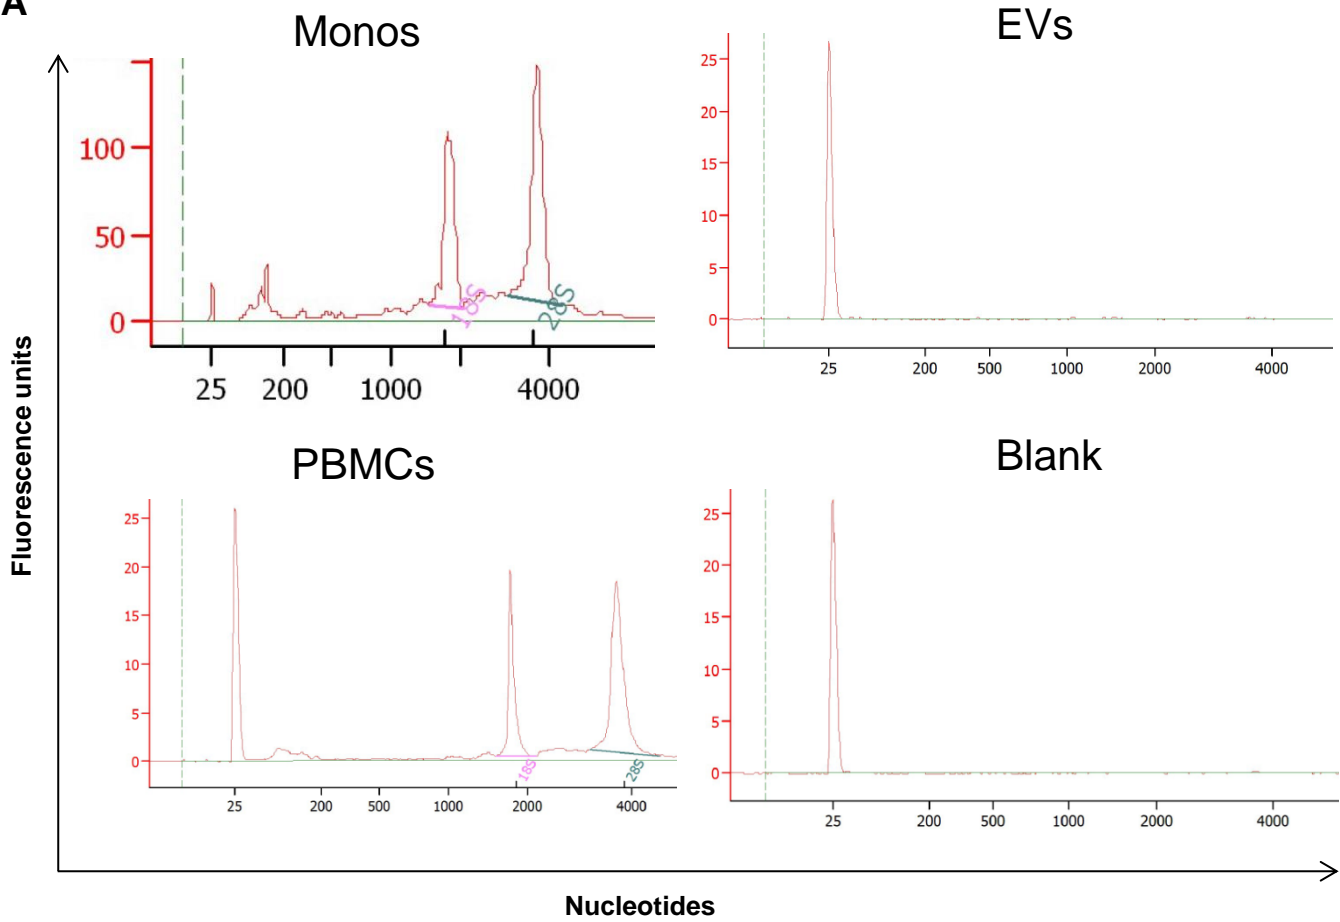

**B**

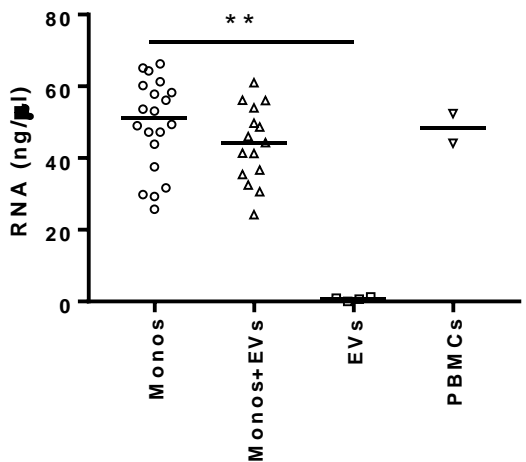

**Supplementary Figure 2: RNA quality and content of monocyte and EV preparations.** A) Representative electropherograms are shown for monocyte, EV, PBMC, and blank conditions. RNA was extracted from  $2 \times 10^6$  cells or EVs. An internal 25 nucleotide control was included in each assay. B) RNA content by Nanodrop for the monocyte conditions with or without EVs used for RNA-Seq experiments. In a separate experiment RNA was quantified for EVs and PBMC positive controls. \*\* $p < 0.01$

# Supplementary Figure 3

**A**

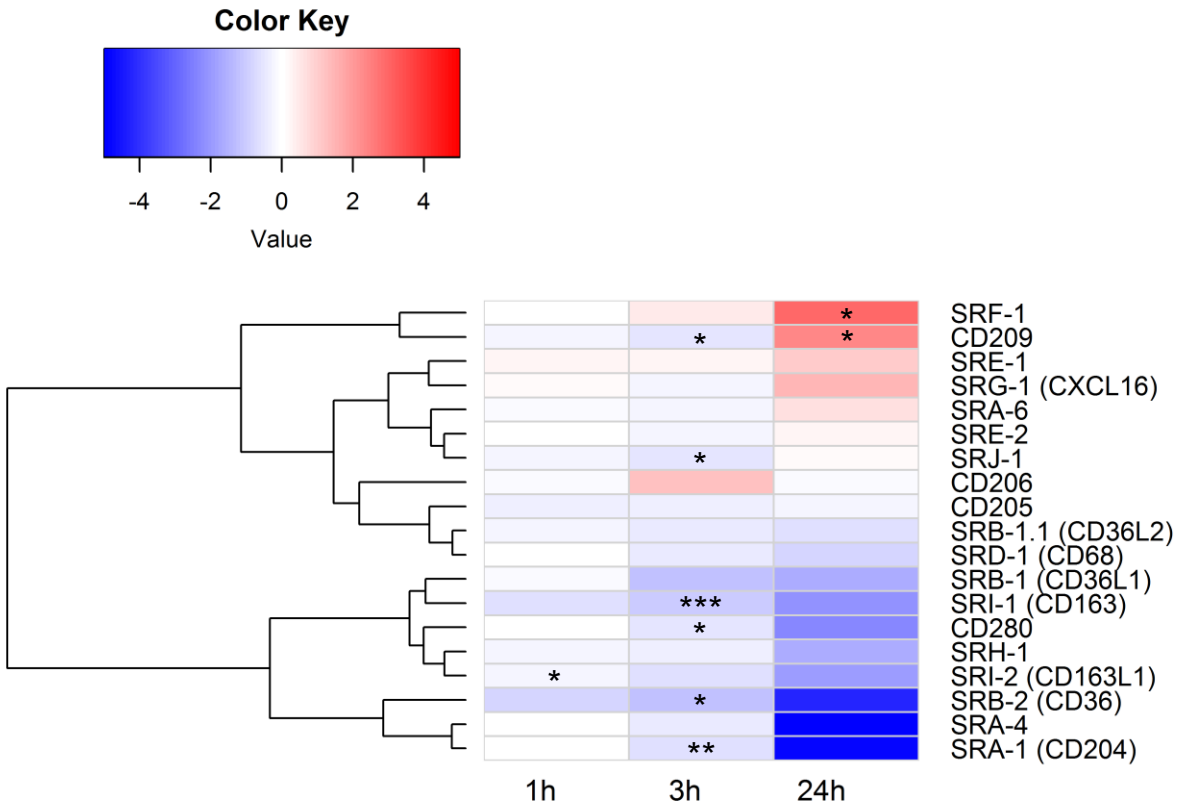

**B**

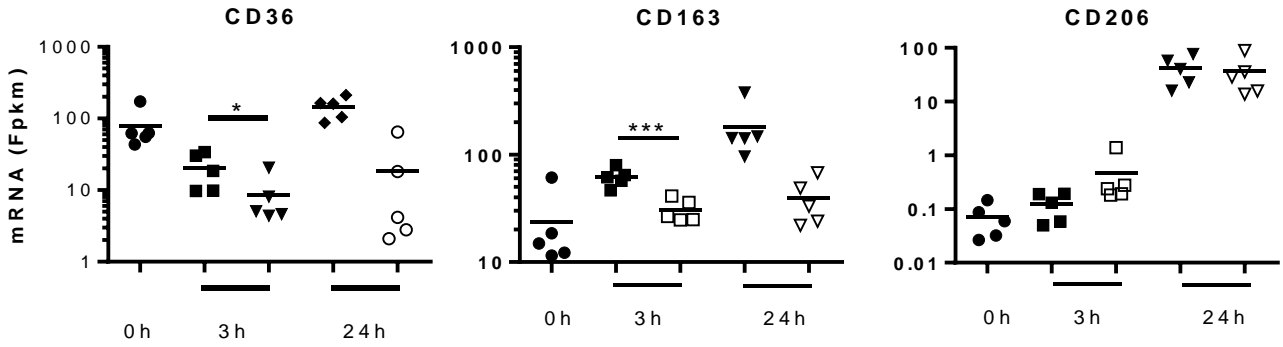

**C**

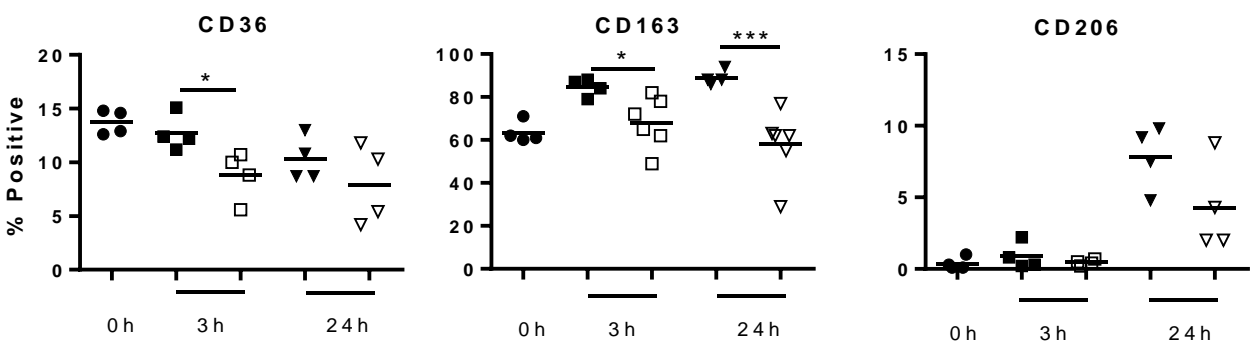

# Supplementary Figure 3

D

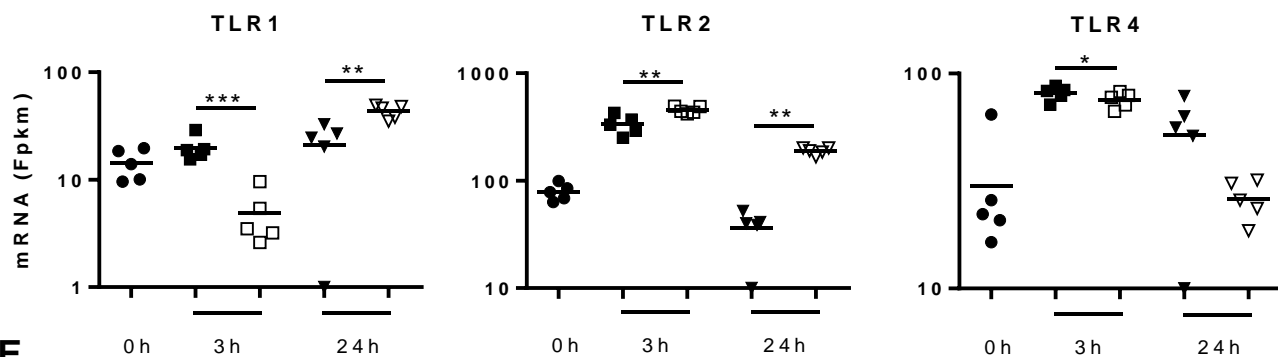

E

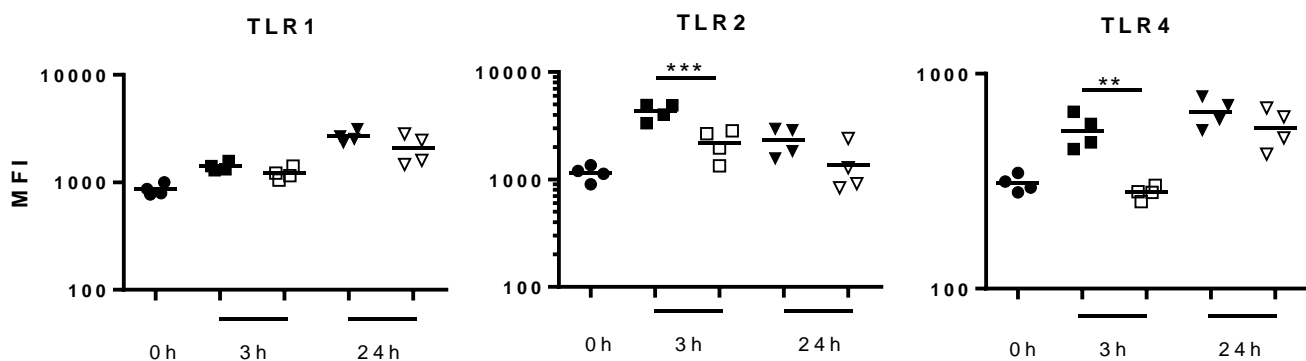

## Supplementary Figure 3: Scavenger receptor modulation after monocyte incubation with EVs.

A) Expression of scavenger receptor mRNA was measured in purified monocytes ( $10^6$ ) from 5 subjects incubated with EVs ( $10^6$ ) from 5 separate subjects. Data were  $\log_2$  transformed and compared to the paired unstimulated monocyte condition as a ratio. Expression of mRNA for 2 receptors was upregulated and for 7 was downregulated at 3 and/or 24h. B) Individual data points for the mRNA expression data are shown for 3 scavenger receptors. C) Surface expression of 3 scavenger receptors was measured in a separate experiment using PBMCs from 4 subjects incubated with EVs from 4 separate subjects. D) Expression of TLR mRNA is shown from the same 5 subjects as above. E) Surface expression of TLR receptors was measured in a separate experiment using PBMCs from 4 subjects incubated with EVs from 4 separate subjects. The level of TLR expression was assessed by flow cytometry after gating on CD14<sup>+</sup> monocytes. \*p<0.05, \*\*p<0.01, \*\*\*p<0.001

# Supplementary Figure 4

A

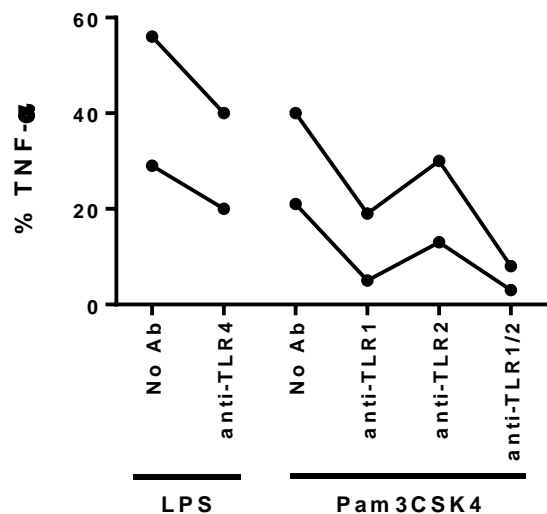

B

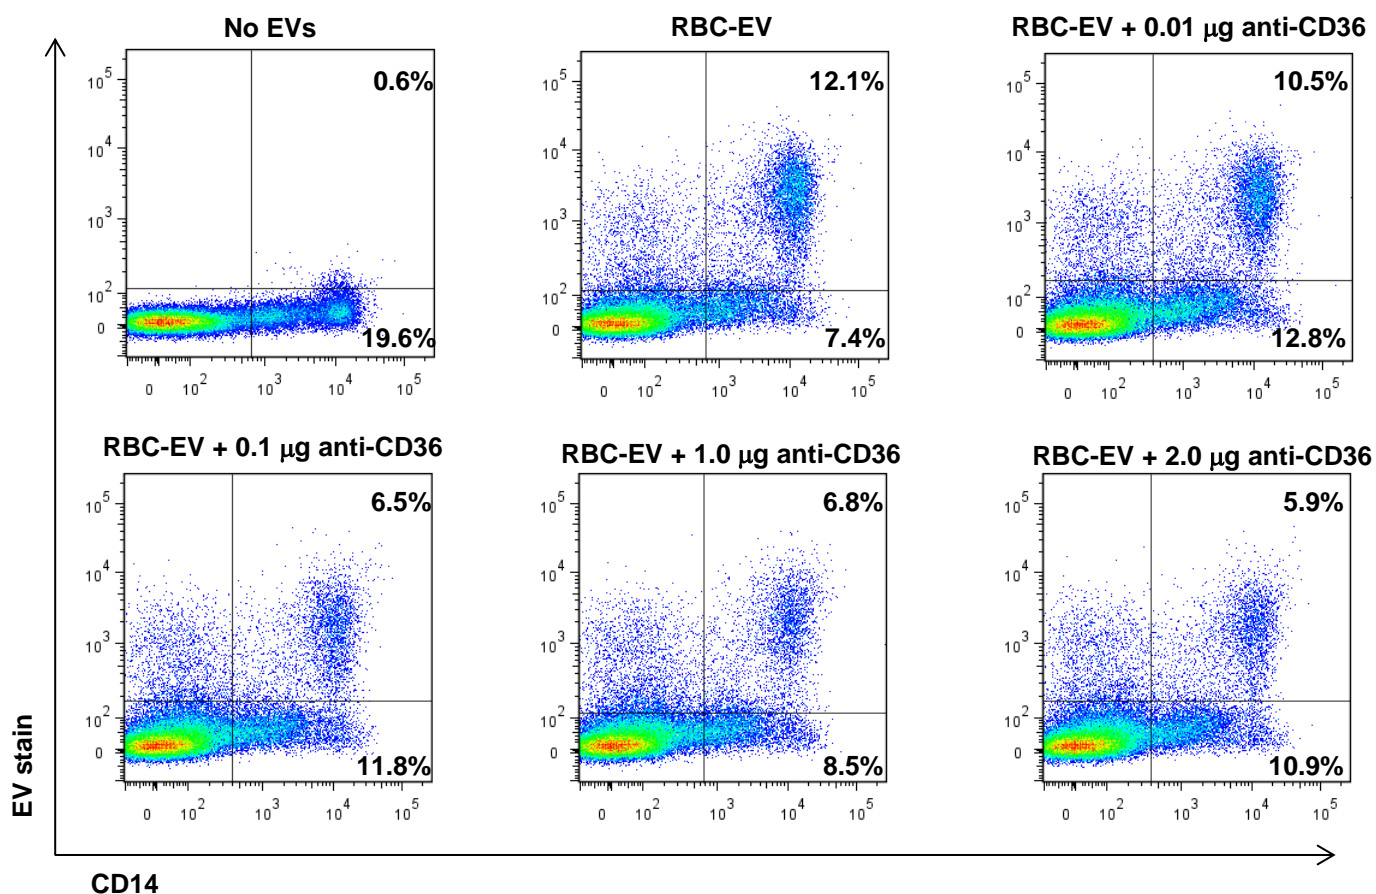

**Supplementary Figure 4: TLR antagonist activity and CD36 antibody titration.** A) To measure whether or not the commercially acquired TLR antibodies had blocking activity, the ability of each to suppress TNF- $\alpha$  production by monocytes was measured. PBMCs from 2 subjects were incubated with the indicated blocking antibody (1  $\mu$ g/mL) for 1h, then stimulated with LPS (5 ng/mL) or Pam3CSK4 (20 ng/ml) for 16h. TNF- $\alpha$  production by monocytes was assessed by intracellular cytokine staining and flow cytometry. B) Individual dot plots show EV (stained with PKH26) uptake by monocytes (CD14+) for RBC-EVs incubated with monocytes pre-incubated for 1h with increasing concentrations of anti-CD36 antibody.
